# Supplementary material for: Long-term safety and efficacy of gene-corrected autologous keratinocyte grafts for recessive dystrophic epidermolysis bullosa
Source: Springer Nature journal article supplement (doi:10.1186/s13023-022-02546-9), 2022-10-17

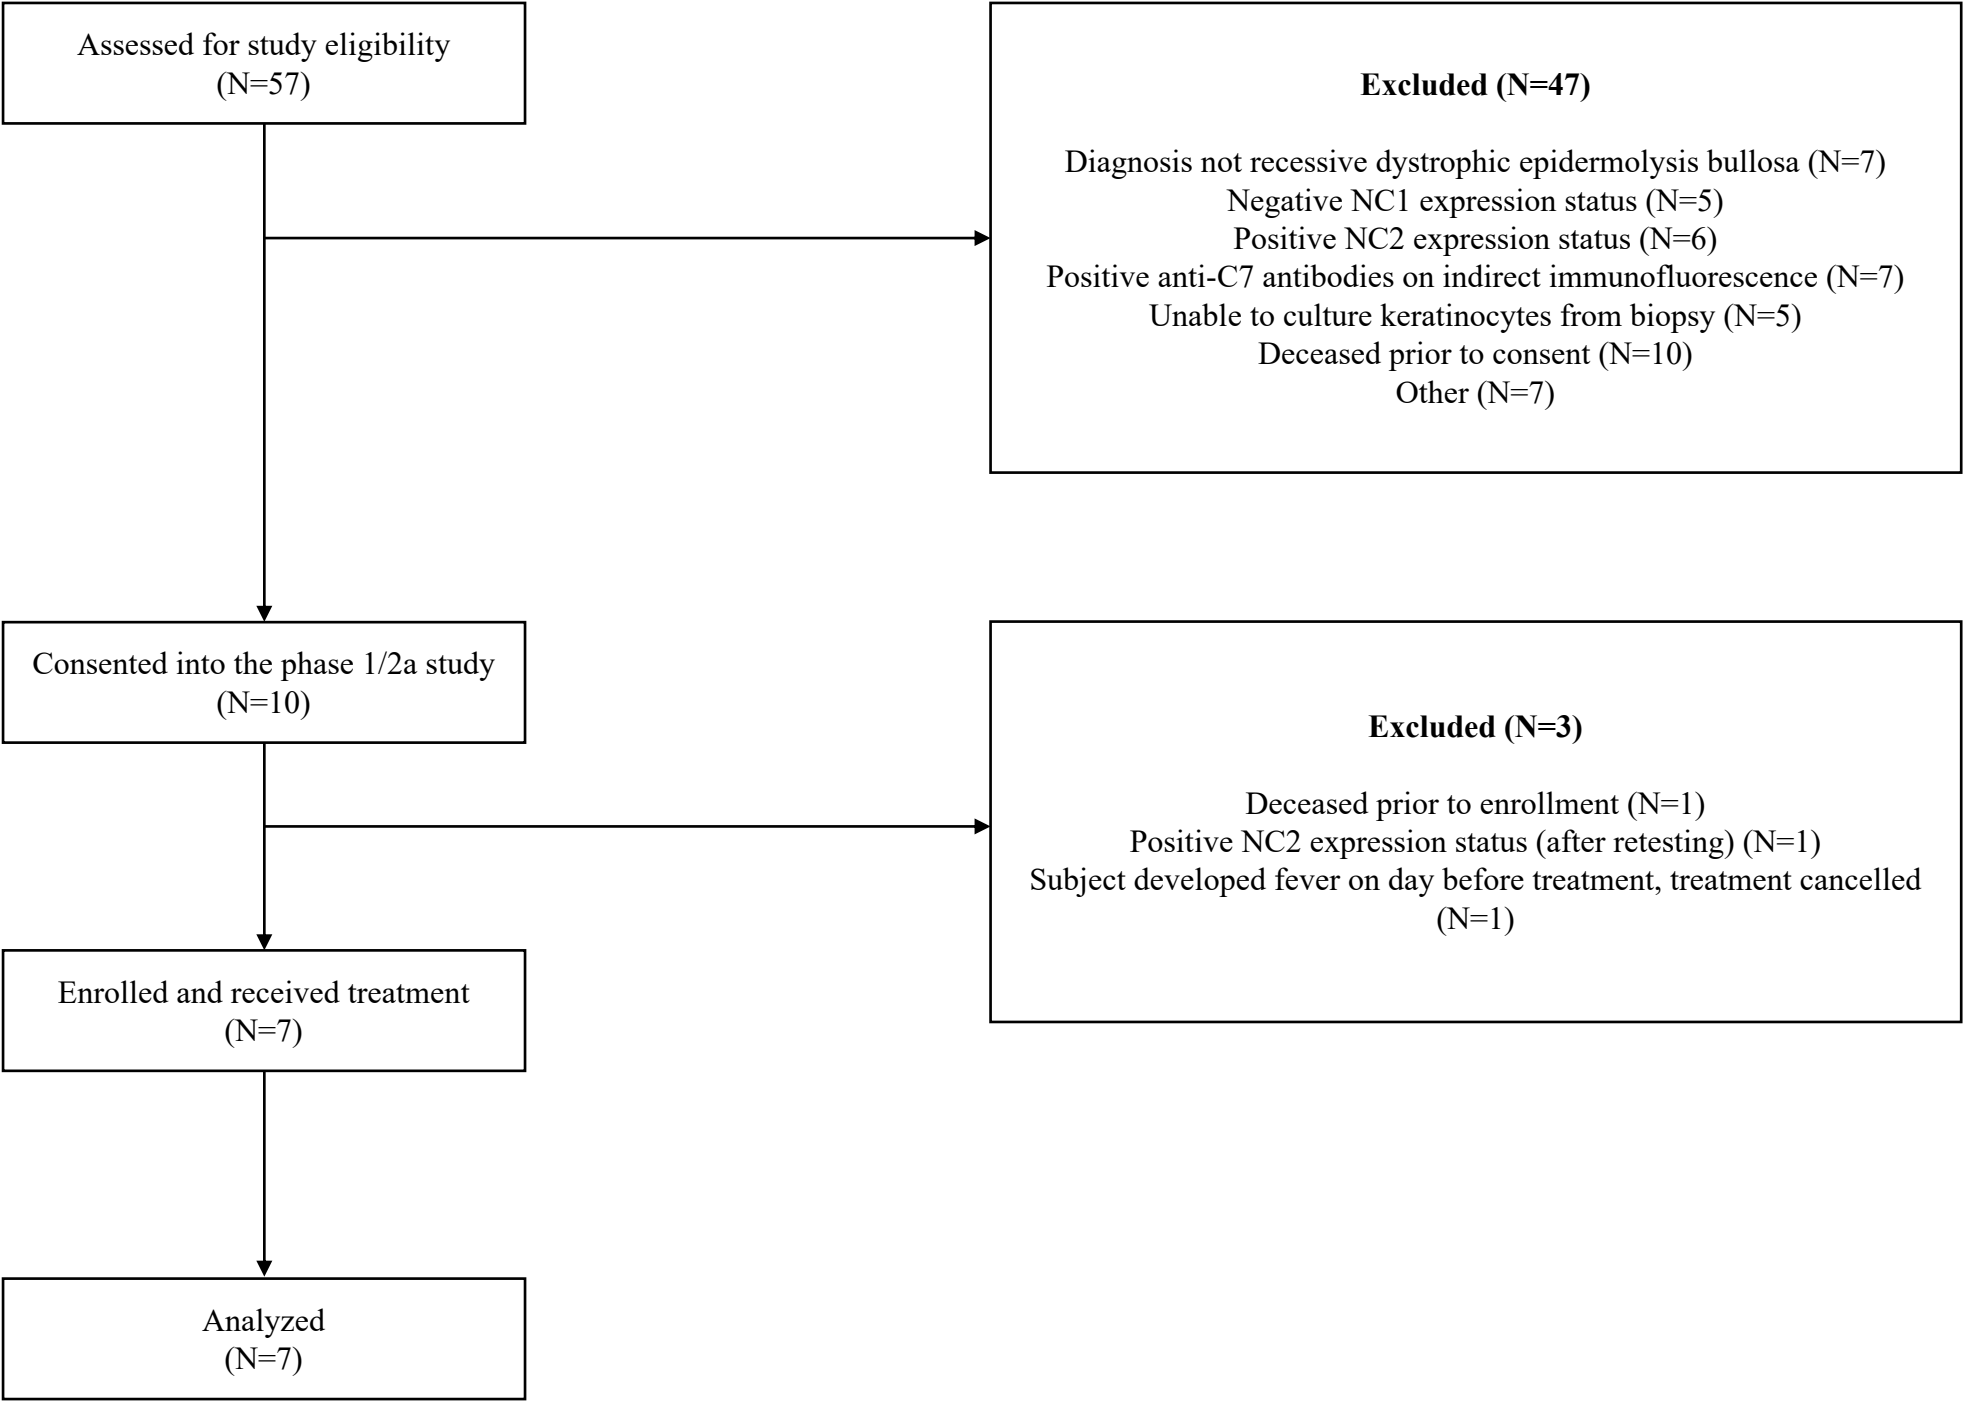

Supplement: MOESM1 [file 23612152]
